# Supplementary material for: Self-assembly of alkyldithiols on a novel dendritic silver nanostructure electrodeposited on a stainless steel wire as a fiber coating for solid-phase microextraction
Source: Royal Society of Chemistry journal article supplement (doi:10.1039/c5ra10093c), 2015-01-01
Supplement: c5ra10093c1.pdf [file c5ra10093c1.pdf]

## Supporting Information

### Fig. S1

**Fig. S1.** SEM images of HS-C<sub>2</sub>-S-AgNDs/ESS (a), HS-C<sub>3</sub>-S-AgNDs/ESS (b), HS-C<sub>6</sub>-S-AgNDs/ESS (c) and HS-C<sub>8</sub>-S-AgNDs/ESS (d) fibers (×20000).

### Fig. S2

**Fig. S2.** SEM images of the SH-C<sub>8</sub>-S-AgNDs/ESS fiber after self-assembly of octanedithiol within 12 h, 24 h, 36 h. Conditions: applied voltage, -0.3 V to 0.3 V; scan rate, 20 mV s<sup>-1</sup>; CV cycles, 20.

### Fig. S3

**Fig. S3.** EDS spectra of the SH-C<sub>8</sub>-S-AgNDs/ESS fiber after self-assembly of octanedithiol within 12 h, 24 h, 36 h.

### Fig. S4

**Fig. S4.** Typical chromatograms of UV filters by direct HPLC (a) and by SPME-HPLC with the bare SS wire (b), the ESS wire (c), the AgNDs/ESS fiber (d) and the SH-C<sub>8</sub>-S-

AgNDs/ESS fiber (e). Conditions: UV filters, 100  $\mu\text{g L}^{-1}$ ; extraction, 30 min; desorption, 4 min; temperature, 35  $^{\circ}\text{C}$ ; stirring, 400  $\text{r min}^{-1}$ .
